# Supplementary material for: TiO2 compact layer induced charge transfer enhancement in a three-dimensional TiO2–Ag array SERS substrate for quantitative and multiplex analysis
Source: Royal Society of Chemistry journal article supplement (doi:10.1039/d3ra00094j), 2023-01-01
Supplement: d3ra00094j1.pdf [file d3ra00094j1.pdf]

# **TiO<sub>2</sub> compact layer induced charge transfer enhancement in three-dimensional TiO<sub>2</sub>-Ag array SERS substrate for quantitative and multiplex analysis**

Zhuang Ding,<sup>a</sup> Yaru Wang,<sup>a</sup> Wanpeng Zhou,<sup>a</sup> Yanna Shui,<sup>a</sup> Zhengdong Zhu,<sup>a</sup> Maofeng Zhang,  
\*<sup>a</sup> Youju Huang,<sup>\*c</sup> Changlong Jiang,<sup>\*d</sup> Jianhua Li,<sup>e</sup> Yucheng Wu<sup>b</sup>

<sup>a</sup> School of Chemistry and Chemical Engineering, Hefei University of Technology, 193 Tunxi Road, Hefei, 230009, China

<sup>b</sup> School of Materials Science and Engineering, Hefei University of Technology, 193 Tunxi Road, Hefei, 230009, China

<sup>c</sup> College of Materials, Chemistry and Chemical Engineering, Hangzhou Normal University, Hangzhou 311121, China

<sup>d</sup> Institute of Solid State Physics, Hefei Institutes of Physical Science, Chinese Academy of Sciences, Hefei, Anhui, 230031, China

<sup>e</sup> Anhui Topway Testing Services Co. Ltd., 18 Rixin Road, Xuancheng Economic and Technological Development Zone, 242000, China

\*Corresponding Authors E-mail: mfzhang@hfut.edu.cn , yjhuang@hznu.edu.cn, cljiang@iim.ac.c

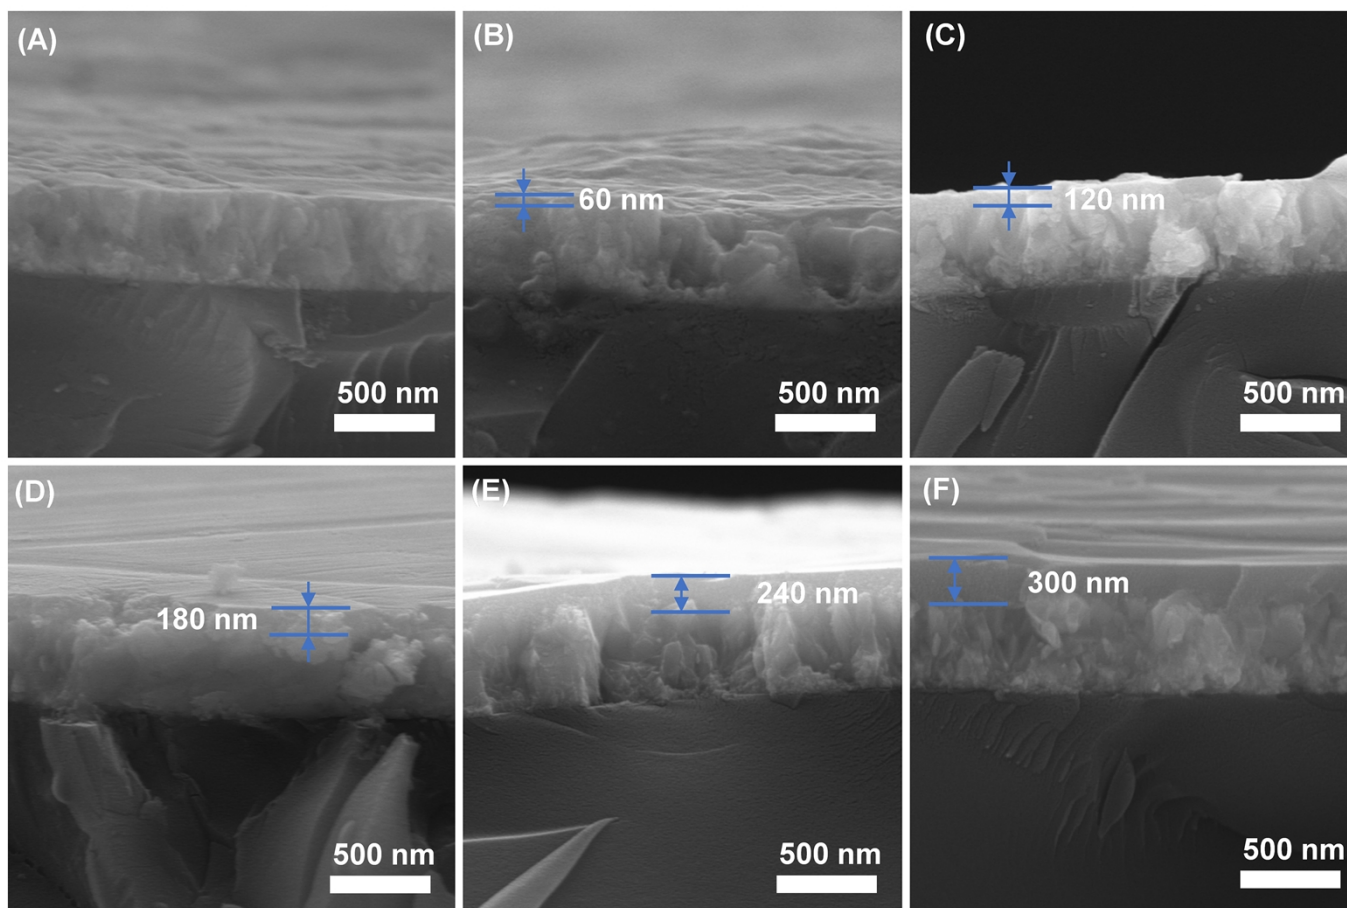

**Figure S1.** Cross-sectional SEM images of (A) FTO substrate, TiO<sub>2</sub> compact layers prepared by different spin-coating cycles (B) once, (C) twice, (D) 3 times, (E) 4 times, (F) 5 times.

### **Estimation method of TiO<sub>2</sub> compact layer thickness**

Since there is no obvious boundary between the TiO<sub>2</sub> compact layer and the SnO<sub>2</sub> coating of FTO, we estimated the thickness of the dense layer by comparing with the surface of FTO. For example, Figure S1A shows the thickness of SnO<sub>2</sub> coating, and Figure S1B shows the sum of the thickness of SnO<sub>2</sub> coating and TiO<sub>2</sub> compact layer by once of spin-coating. The thickness of TiO<sub>2</sub> compact layer can be obtained by the difference. The data of TiO<sub>2</sub> compact layer thickness in the figure is the approximate value obtained by comparison.

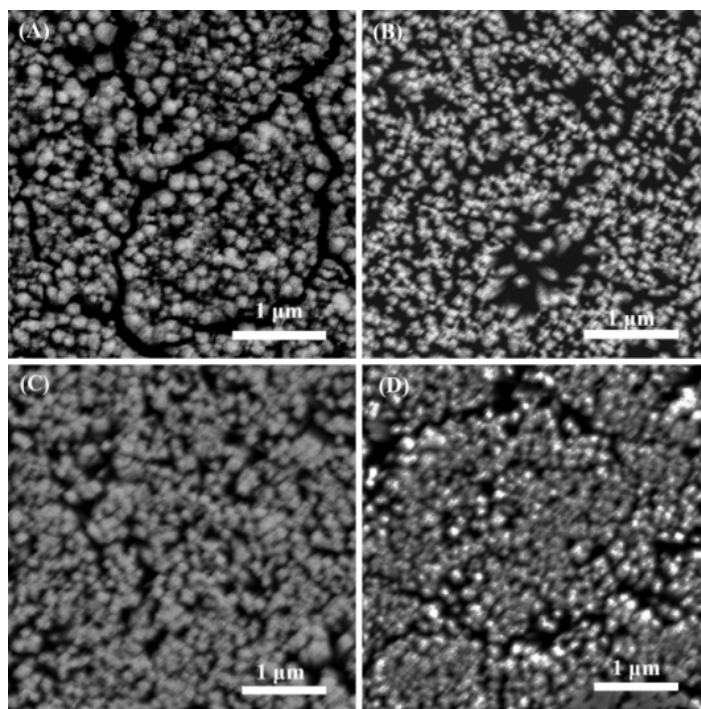

**Figure S2.** Images of  $\text{TiO}_2$  nanorod arrays grown under (A) 17.5 mL deionized water, 12.5 mL hydrochloric acid and 388  $\mu\text{L}$  tetra-butyl titanate at  $150^\circ\text{C}$  for 5h; (B) 15 mL deionized water, 15 mL hydrochloric acid and 388  $\mu\text{L}$  tetra-butyl titanate at  $150^\circ\text{C}$  for 5h; (C) 15 mL deionized water, 15 mL hydrochloric acid and 388  $\mu\text{L}$  tetrabutyl titanate at  $150^\circ\text{C}$  for 7.5h; (D) 15 mL deionized water, 15 mL hydrochloric acid and 388  $\mu\text{L}$  tetrabutyl titanate at  $150^\circ\text{C}$  for 10h.

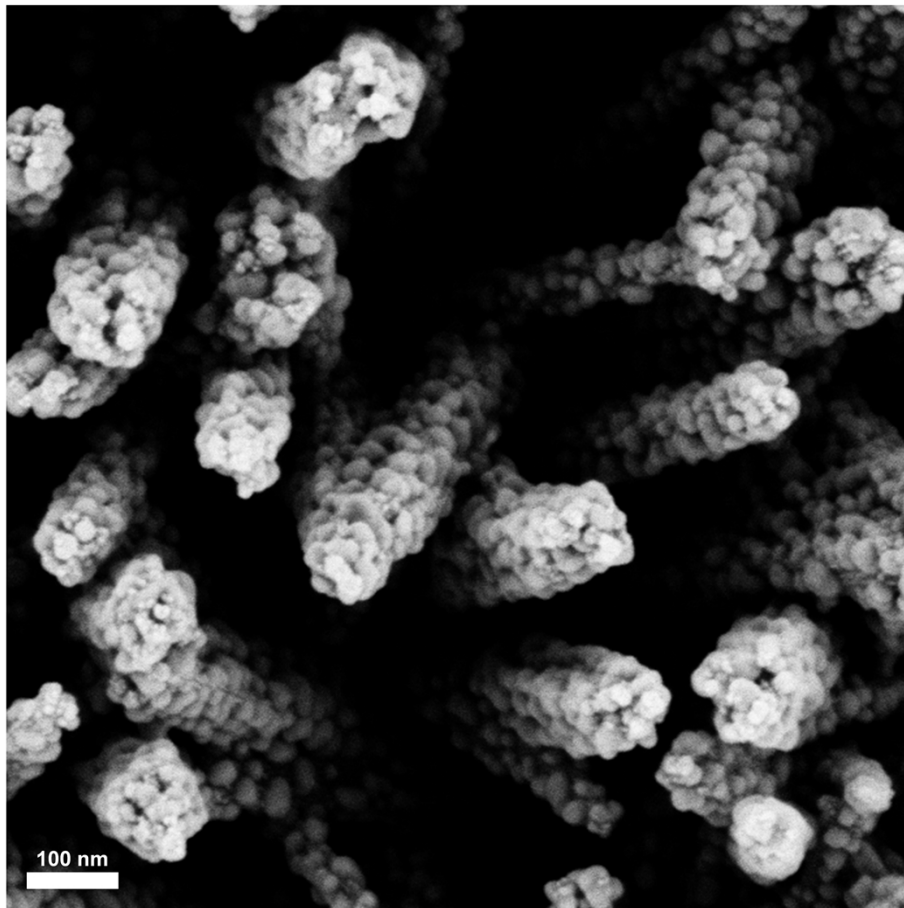

**Figure S3.** The locally enlarged view of the TiO<sub>2</sub>-Ag composite structure.

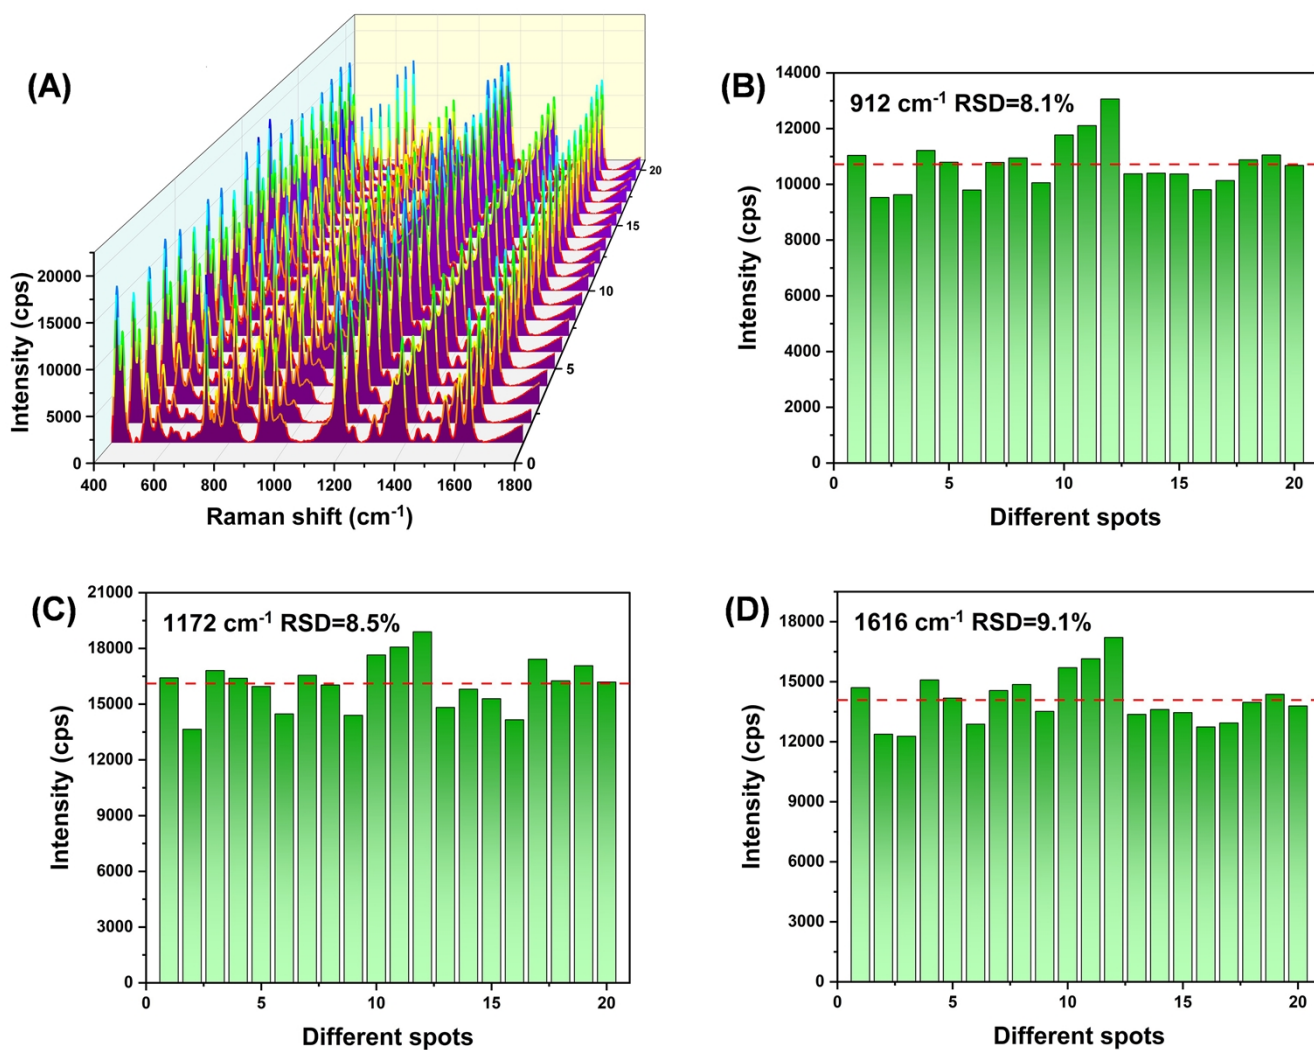

**Figure S4.** (A) SERS spectra of CV ( $10^{-6}$  M) at 20 different points on  $\text{TiO}_2\text{-Ag}$  composite structure; the RSD values of different peaks (B)  $912 \text{ cm}^{-1}$ , (C)  $1172 \text{ cm}^{-1}$  and (D)  $1619 \text{ cm}^{-1}$

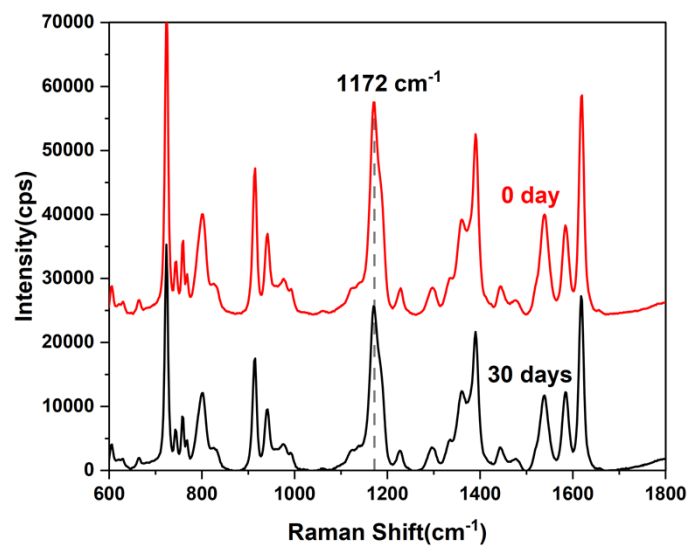

**Figure S5.** SERS spectra of newly prepared substrate and that stored for 30 days.

## Calculation of SERS enhancement factor (EF)

To quantify the enhancement contribution from TiO<sub>2</sub>-Ag composite structure and TiO<sub>2</sub> compact layer, we calculated their enhancement factor (EF) based on the following formula:

$$EF = (I_{\text{SERS}} / I_{\text{BULK}}) \times (N_{\text{BULK}} / N_{\text{SERS}})$$

where  $I_{\text{SERS}}$  and  $I_{\text{BULK}}$  represent the intensities of SERS and normal Raman scattering, whereas  $N_{\text{SERS}}$  and  $N_{\text{BULK}}$ , respectively, denote the numbers of corresponding CV molecules effectively excited by a laser beam. According to the above formula, the EF for the TiO<sub>2</sub>-Ag composite structure without TiO<sub>2</sub> compact layer is calculated to be  $2.70 \times 10^4$ . The EF is calculated to be  $4.02 \times 10^5$  for the TiO<sub>2</sub>-Ag composite structure. As a result, the EF for the TiO<sub>2</sub>-Ag composite structure shows a 10-fold enhancement compared to the composite structure without TiO<sub>2</sub> compact layer.

$$N_{\text{BULK}} = (\text{Laser spot area} / \text{Diffusion area}) \times (N_A \times \text{Volume}_{\text{BULK}} \times \text{Concentration}_{\text{BULK}})$$

$$N_{\text{SERS}} = (\text{Laser spot area} / \text{Substrate area}) \times (N_A \times \text{Volume}_{\text{SERS}} \times \text{Concentration}_{\text{SERS}})$$

$$\text{Diffusion area} = \pi(d/2)^2 = 0.5027 \text{ cm}^2$$

$$\text{Substrate area} = 0.25 \text{ cm}^2$$

$$\text{Volume}_{\text{BULK}} = \text{Volume}_{\text{SERS}}$$

$$\text{Concentration}_{\text{BULK}} = 10^5 \times \text{Concentration}_{\text{SERS}}$$

$$N_{\text{BULK}} / N_{\text{SERS}} = (0.25 / 0.5027) \times 10^4 = 5 \times 10^3$$

$I$  = intensity of the 1172 cm<sup>-1</sup> peak

$$I_{\text{BULK}} = 14989$$

$$I_{\text{SERS, TiO}_2/\text{Ag}} = 80855$$

$$I_{\text{SERS, TiO}_2/\text{Ag}} / I_{\text{BULK}} = 5.39$$

$$EF_{\text{TiO}_2/\text{Ag}} = (I_{\text{SERS}} / I_{\text{BULK}}) \times (N_{\text{BULK}} / N_{\text{SERS}}) = 2.70 \times 10^4$$

$$I_{\text{SERS, c-TiO}_2/\text{TiO}_2/\text{Ag}} = 847235$$

$$I_{\text{SERS, c-TiO}_2/\text{TiO}_2/\text{Ag}} / I_{\text{BULK}} = 56.52$$

$$EF_{\text{c-TiO}_2/\text{TiO}_2/\text{Ag}} = (I_{\text{SERS}} / I_{\text{BULK}}) \times (N_{\text{BULK}} / N_{\text{SERS}}) = 2.83 \times 10^5$$

$$EF_{\text{c-TiO}_2/\text{TiO}_2/\text{Ag}} / EF_{\text{TiO}_2/\text{Ag}} = 2.83 \times 10^5 / 2.70 \times 10^4 = 10.48$$

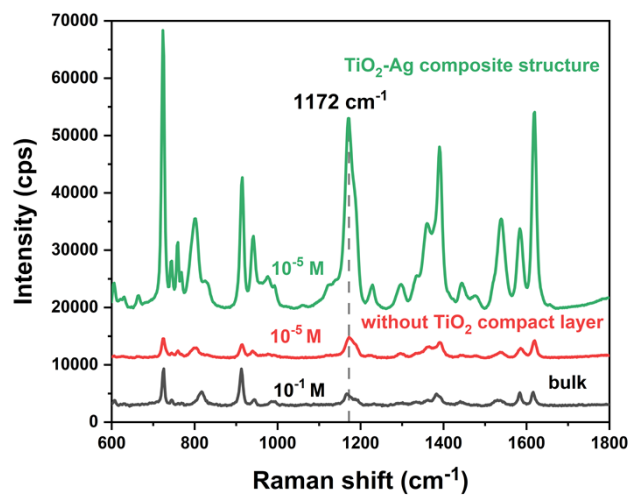

Figure S6. Raman spectrum of CV solution and SERS spectra of CV absorbed on TiO<sub>2</sub>-Ag composite structure with or without TiO<sub>2</sub> compact layer
